# Supplementary material for: A Multimodal Imaging-Supported Down Syndrome Mouse Model of RSV Infection
Source: MDPI journal article supplement (doi:10.3390/v15040993), 2023-04-18
Supplement: s1 [file s1]

## Supplementary Materials:

The following supporting information can be downloaded at: [www.mdpi.com/xxx/s1](http://www.mdpi.com/xxx/s1),

Table S1. Antibodies used for flow cytometry;

Figure S1. The gating strategy for the myeloid panel on flow cytometry in the lung and spleen;

Figure S2. The gating strategy for the lymphoid panel on flow cytometry in the lung and spleen;

Figure S3. BAL fluid total cell count and alveolar macrophages;

Figure S4. Flow cytometric analysis of the lung immunological status in wild type and Ts65Dn mice;

Figure S5. Proportions of CD4<sup>+</sup> and CD8<sup>+</sup> T cell populations in the lung of wild type and Ts65Dn mice throughout rhRSV-Luc infection;

Figure S6. Proportions of CD4<sup>+</sup> and CD8<sup>+</sup> T cell populations in the spleen of wild type and Ts65Dn mice throughout rhRSV-Luc infection.

Supplementary Table S1: antibodies used for flow cytometry

| Antigen                                    | Fluorophore                        | Company     |
|--------------------------------------------|------------------------------------|-------------|
| <b>Lymphoid panel (100 000 cells read)</b> |                                    |             |
| CD3                                        | FITC                               | eBioscience |
| CD8                                        | PerCP-Cy5.5                        | eBioscience |
| CD44                                       | PE                                 | Biolegend   |
| NK1.1                                      | PE-Cy7                             | eBioscience |
| CD4                                        | APC-eFluor 780                     | eBioscience |
| CD62L                                      | APC                                | eBioscience |
| B220                                       | BV786                              | BD          |
| CD45                                       | BUV395                             | BD          |
| Live/dead                                  | Zombie Aqua™ Fixable Viability Kit | Biolegend   |
| <b>Myeloid panel (200 000 cells read)</b>  |                                    |             |
| CD45                                       | FITC                               | Biolegend   |
| CD103                                      | PerCP-eFluor 710                   | eBioscience |
| CD11c                                      | PE-Cy7                             | Biolegend   |
| CD64                                       | PE                                 | Biolegend   |
| F4/80                                      | PE                                 | eBioscience |
| CD24                                       | PE-CF594                           | Biolegend   |
| SiglecF                                    | eFluor 660                         | eBioscience |
| Ly6G                                       | Alexa fluor 700                    | BD          |
| Ly6C                                       | APC-Cy7                            | BD          |
| CD11b                                      | eFluor 450 or PerCP-Cy5.5          | eBioscience |
| MHC-II                                     | Horizon v500                       | BD          |
| CD3                                        | BV650                              | Biolegend   |
| CD19                                       | BV650                              | Biolegend   |
| NK1.1                                      | BV650                              | Biolegend   |
| Live/dead                                  | Zombie UV™ Fixable Viability Kit   | Biolegend   |

Myeloid panel

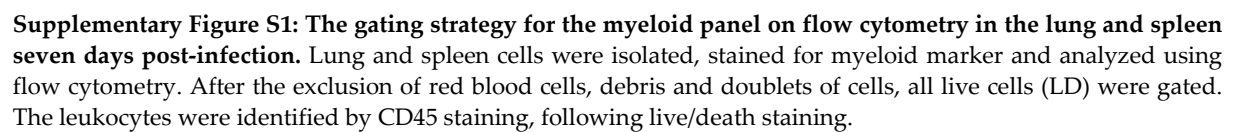

Lymphoid panel

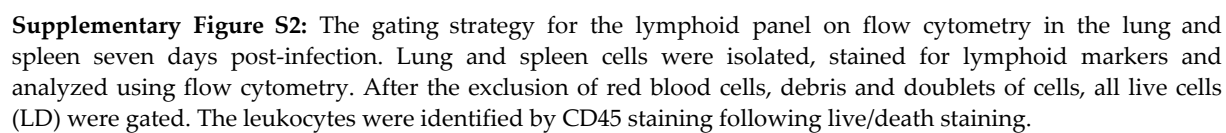

Supplementary Figure S3 – BAL total cell count and alveolar macrophages

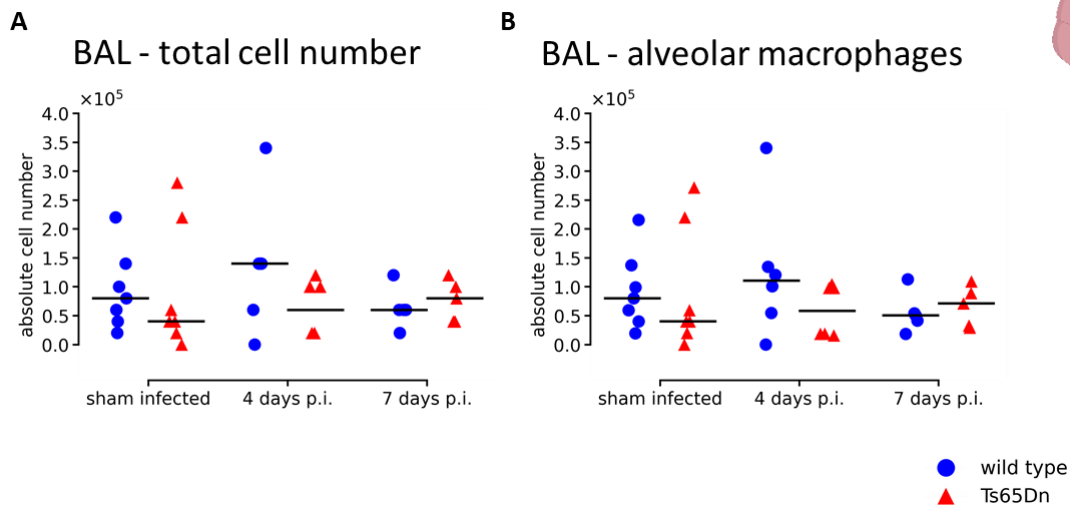

**Supplementary Figure S3:** BAL fluid total cell count and alveolar macrophages. (A) Analysis of the total cell count in BAL fluid and (B) number of alveolar macrophages in wild type (blue circle) and Ts65Dn (red triangle) mice at each time point and expressed as individual values and group median. \* $p < 0.05$ , \*\* $p < 0.01$ , \*\*\* $p < 0.001$ , \*\*\*\* $p < 0.0001$ .

Supplementary Figure S4 – Lung myeloid cells

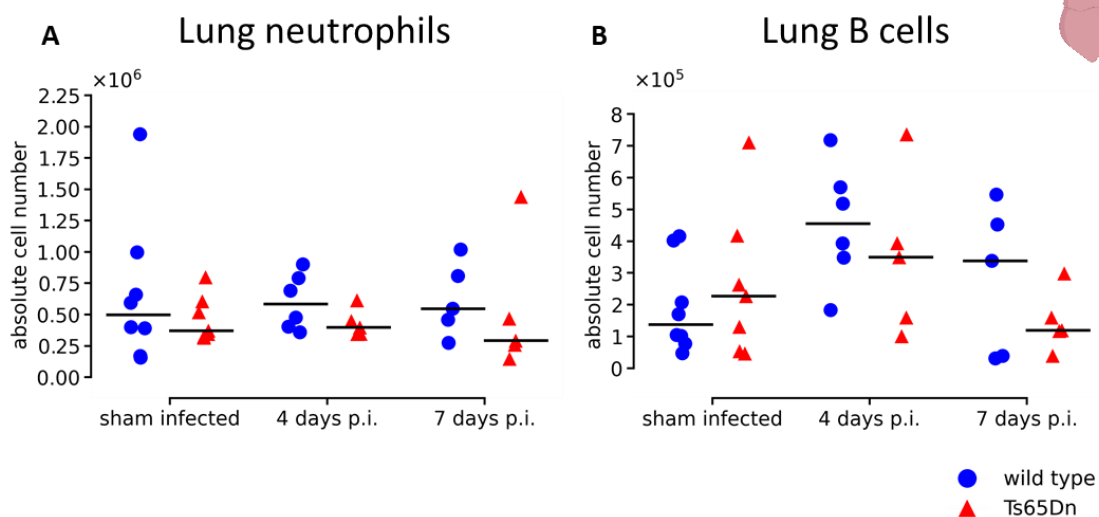

**Supplementary Figure S4:** Flow cytometric analysis of the lung immunological status in wild type and Ts65Dn mice after sham, four days or seven-days rhRSV-Luc infection. (A) the absolute number of lung neutrophils and (B) lung B-cells were presented in wild type (blue circle) and Ts65Dn (red triangle) mice at each time point and expressed as individual values and group median. \* $p < 0.05$ , \*\* $p < 0.01$ , \*\*\* $p < 0.001$ , \*\*\*\* $p < 0.0001$ .

Supplementary Figure S5 – Lung T cells

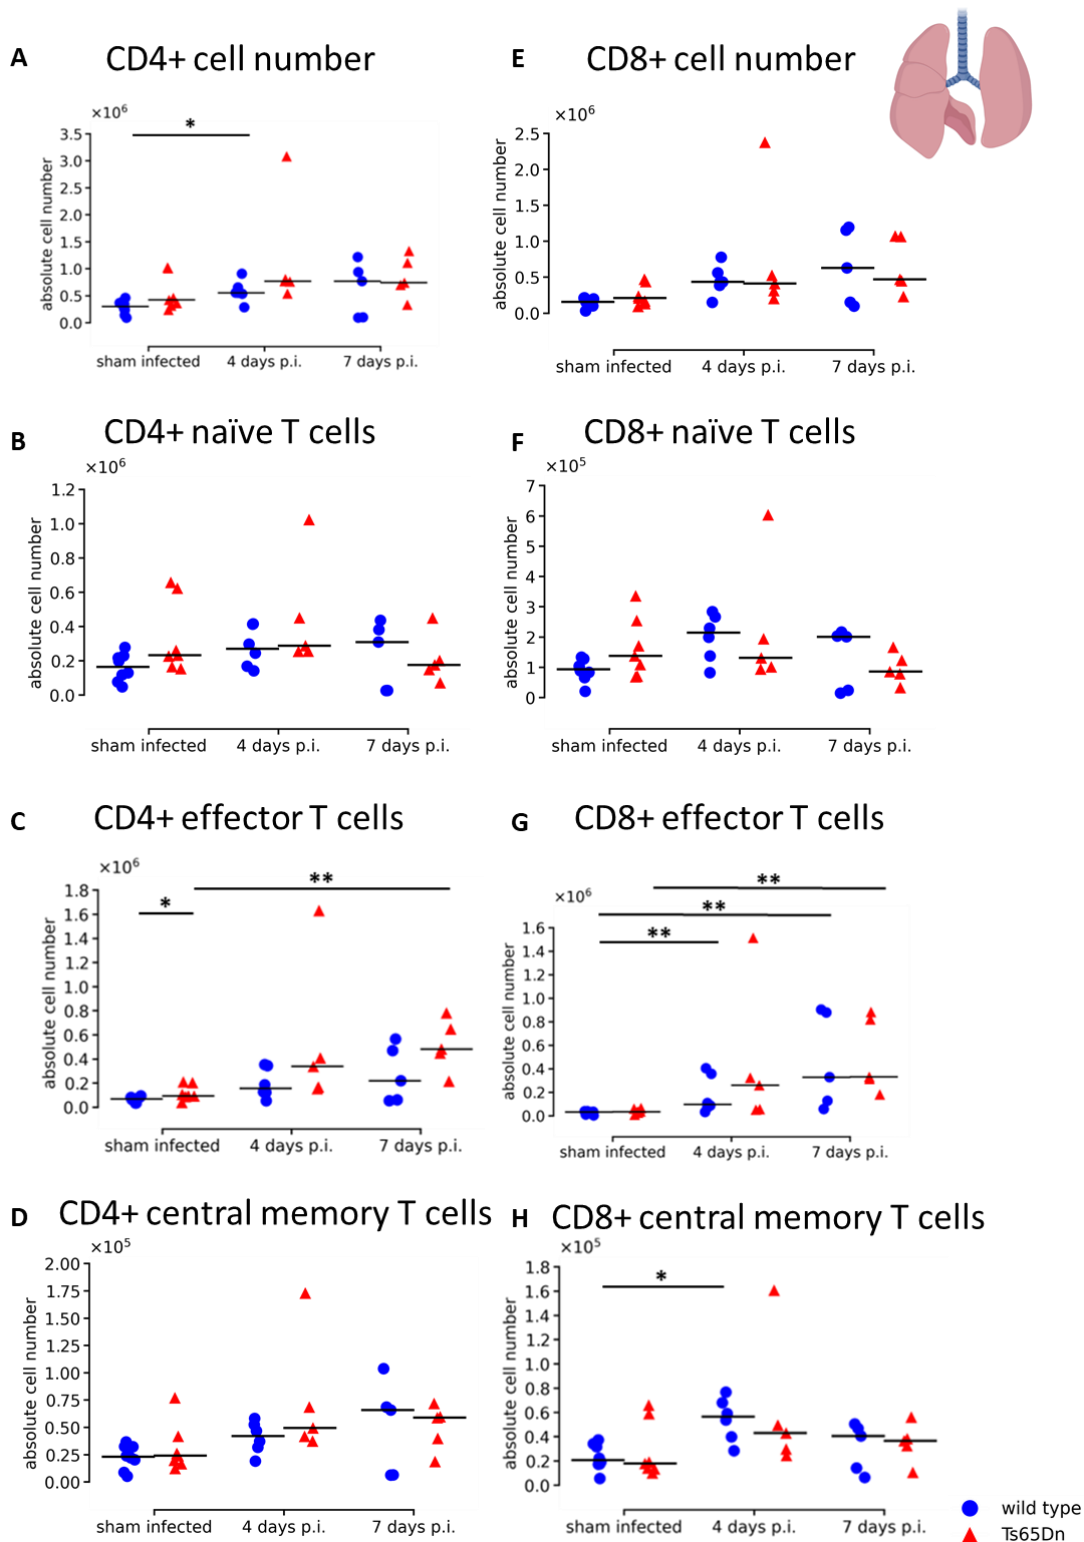

**Supplementary Figure S5:** Proportions of CD4+ and CD8+ T cell populations in the lung of wild type and Ts65Dn mice throughout rhRSV-Luc infection. (A). The absolute number of CD4+ T cells (CD45+, CD3+, CD4+), (B) CD4+ naïve T cells (CD44– CD62L+), (C) CD4+ effector T cells (CD44+ CD62L–) and (D) CD4+ central memory T cells (CD44+ CD62L+) and the absolute number of (E) CD8+ T cells (CD45+, CD3+, CD8+), (F) CD4+ naïve T cells (CD44– CD62L+), (G) CD4+ effector T cells (CD44+ CD62L–) and (H) CD8+ central memory T cells (CD44+ CD62L+) of wild type and Ts65Dn mice were presented as individual values with group median for sham infected, four and seven-day post infection in lung digestion. \*p < 0.05, \*\*p < 0.01, \*\*\*p < 0.001, \*\*\*\*p < 0.0001.

Supplementary Figure S6 – Spleen T cells

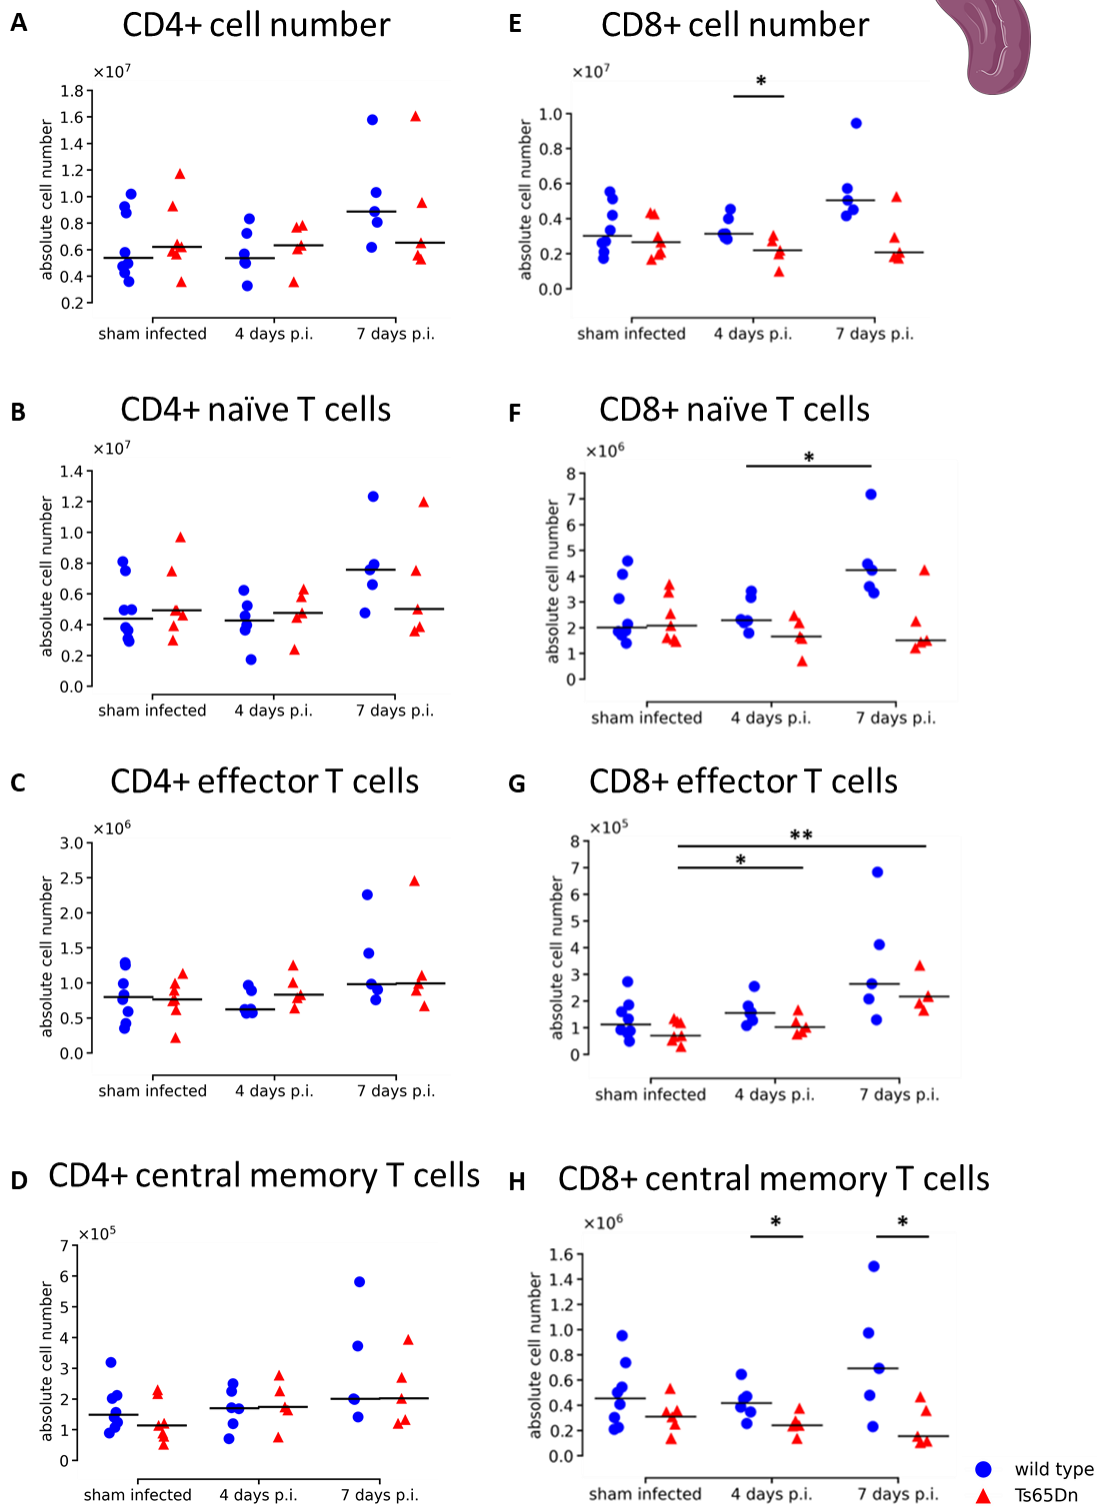

**Supplementary Figure S6:** Proportions of CD4+ and CD8+ T cell populations in the spleen of wild type and Ts65Dn mice throughout rhRSV-Luc infection. (A). The absolute number of CD4+ T cells (CD45+, CD3+, CD4+), (B) CD4+ naïve T cells (CD44– CD62L+), (C) CD4+ effector T cells (CD44+ CD62L–) and (D) CD4+ central memory T cells (CD44+ CD62L+) and the absolute number of (E) CD8+ T cells (CD45+, CD3+, CD8+), (F) CD4+ naïve T cells (CD44– CD62L+), (G) CD4+ effector T cells (CD44+ CD62L–) and (H) CD8+ central memory T cells (CD44+ CD62L+) of wild type and Ts65Dn mice were presented as individual values with group median for sham infected, four and seven-day post-infection in spleen digestion. \* $p < 0.05$ , \*\* $p < 0.01$ , \*\*\* $p < 0.001$ , \*\*\*\* $p < 0.0001$ .
